# Supplementary material
Source: HighWire-hosted journal article supplement (https://openheart.bmj.com/content/6/1/e001056)
Supplement: inline-supplementary-material-1 [file inline-supplementary-material-1.docx]

Table 5: 6-minute walk test

|  | **Total small ASD**  **n=151** | **No tachyarrhythmia**  **N=118** | **Supraventricular tachycardia n=24** | **p-value** | **Ventricular tachycardia**  **n=12** | **p-value** |
| --- | --- | --- | --- | --- | --- | --- |
| Walking distance, m | 634±90 | 633±91 | 652±91 | 0.370 | 611±99 | 0.439 |

The p-value refers to the comparison between ASD patients with tachyarrhythmias and ASD patients without tachyarrhythmias.
